# Supplementary material
Source: PubMed Central journal article supplement (PMC9888262)
Supplement: jvi.01381-22-s0001.pdf [file jvi.01381-22-s0001.pdf]

Table S1. Information of virus strains used for phylogenetic analysis in Fig. 1.

| Organism                                                 | Accession      | abbreviation |
|----------------------------------------------------------|----------------|--------------|
| Linepithema humile narna-like virus 1                    | AXA52546.1     | LhuNLV1      |
| Wilkie narna-like virus 2                                | YP_009388579.1 | WkNV2        |
| Wuhan spider virus 7                                     | YP_009344979.1 | WhSV7        |
| Hubei narna-like virus 3                                 | YP_009337787.1 | HbNLV3       |
| Shahe narna-like virus 7                                 | YP_009336622.1 | ShNLV7       |
| Alternaria brassicicola mitovirus                        | AKN79252.1     | AbraMV1      |
| Beihai narna-like virus 23                               | YP_009333261.1 | BhNLV23      |
| Beihai narna-like virus 22                               | YP_009333139.1 | BhNLV22      |
| Wenzhou narna-like virus 1                               | APG77283.1     | WzNLV1       |
| Shahe levi-like virus 1                                  | APG77171.1     | ShLLV1       |
| Shahe narna-like virus 4                                 | APG77168.1     | ShNLV4       |
| Changjiang levi-like virus 3                             | APG77119.1     | CjLLV3       |
| Cannabis sativa mitovirus 1                              | DAB41746.2     | CasaMV1      |
| Saccharomyces 23S RNA narnavirus                         | NP_660177.1    | ScNV23S      |
| Saccharomyces 20S RNA narnavirus                         | NP_660178.1    | ScNV20S      |
| Dahlia pinnata mitovirus 1                               | DAB41753.1     | DpMV1        |
| Escherichia virus Qbeta                                  | NP_046752.1    | EVQβ         |
| Beta vulgaris mitovirus 1                                | DAB41759.1     | BevuMV1      |
| Rhizopus microsporus 20S narnavirus                      | QBC65280.1     | RmV20S       |
| Blechmonas luni narnavirus 1                             | YP_009553634.1 | BlunNV1      |
| Aspergillus fumigatus narnavirus 1                       | AXE72933.1     | AfuNV1       |
| Aspergillus fumigatus narnavirus 2                       | AXE72934.1     | AfuNV2       |
| Botrytis cinerea mitovirus 1                             | YP_002284334.2 | BcMV1        |
| Chenopodium quinoa mitovirus 1                           | AWL21855.1     | CqMV1        |
| Pyricularia oryzae ourmia-like virus 1                   | BBF90576.1     | PoOLV        |
| Sclerotinia sclerotiorum mitovirus 27                    | AWY10985.1     | SsMV27       |
| Sclerotinia sclerotiorum mitovirus 28                    | AWY10986.1     | SsMV28       |
| Sclerotinia sclerotiorum mitovirus 30                    | AWY10988.1     | SsMV30       |
| Sclerotinia sclerotiorum mitovirus 32                    | AWY10990.1     | SsMV32       |
| Phomopsis longicolla RNA virus 1                         | YP_009345044.1 | PLRV1        |
| Agaricus bisporus mitovirus 1                            | AQM32767.1     | AbMV1        |
| Sclerotinia sclerotiorum mitovirus 1 HC025               | YP_009121785.1 | SsMV1        |
| Sclerotinia sclerotiorum mitovirus 12                    | AHF48628.1     | SsMV12       |
| Sclerotinia sclerotiorum mitovirus 11                    | AHF48627.1     | SsMV11       |
| Sclerotinia sclerotiorum mitovirus 19                    | ALD89136.1     | SsMV19       |
| Cassava virus C                                          | YP_003104770.1 | CsVC         |
| Epirus cherry virus                                      | YP_002019754.1 | EpCV         |
| Ourmia melon virus                                       | YP_002019757.1 | OuMV         |
| Cryphonectria cubensis mitovirus 1a                      | AAR01970.1     | CcMV1a       |
| Enterobacteria phage SP                                  | NP_695028.1    | EPSP         |
| Phytophthora infestans RNA virus 4                       | YP_009241365.1 | PiRV4        |
| Fusarium poae narnavirus 1                               | YP_009272902.1 | FpNV1        |
| Fusarium poae mitovirus 4                                | YP_009272901.1 | FpMV4        |
| Fusarium poae mitovirus 3                                | YP_009272900.1 | FpMV3        |
| Fusarium poae mitovirus 2                                | YP_009272899.1 | FpMV2        |
| Fusarium poae mitovirus 1                                | YP_009272898.1 | FpMV1        |
| Alternaria arborescens mitovirus 1                       | YP_009270635.1 | AaMV1        |
| Phytomonas serpens narnavirus 1                          | YP_009256557.1 | PserNV1      |
| Sclerotinia sclerotiorum mitovirus 4                     | AMT92141.1     | SsMV4        |
| Fusarium poae narnavirus 2                               | YP_009272903.1 | FpNV2        |
| Cronartium ribicola mitovirus 1                          | AMQ67414.1     | CrMV1        |
| Botrytis ourmia-like virus                               | YP_009182165.1 | BOLV         |
| Sclerotinia sclerotiorum mitovirus 3                     | YP_009182164.1 | SsMV3        |
| Botrytis cinerea mitovirus 4                             | YP_009182163.1 | BcMV4        |
| Botrytis cinerea mitovirus 3                             | YP_009182161.1 | BcMV3        |
| Botrytis cinerea mitovirus 2                             | YP_009182160.1 | BcMV2        |
| Sclerotinia sclerotiorum ourmia-like virus 2             | ALD89139.1     | SsOV2        |
| Sclerotinia sclerotiorum ourmia-like virus 1             | ALD89138.1     | SsOV1        |
| Plasmopara viticola lesion associated orfanplasmovirus 1 | QNQ74063.1     | PvLaOrfPIV1  |
| Oidiodendron maius splipalmivirus 1                      | QNN89179.1     | OmSPV1       |
| Plasmopara viticola lesion associated narnavirus 40      | QIR30319.1     | PVaNarna40   |
| Plasmopara viticola lesion associated narnavirus 35      | QIR30314.1     | PVaNarna35   |
| Plasmopara viticola lesion associated orfanplasmovirus 2 | QNQ74064.1     | PvLaOrfPIV2  |
| Plasmopara viticola lesion associated narnavirus 31      | QIR30310.1     | PVaNarna31   |

|                                                            |                |             |
|------------------------------------------------------------|----------------|-------------|
| Plasmopara viticola lesion associated narnavirus 28        | QIR30307.1     | PVaNarna25  |
| Plasmopara viticola lesion associated narnavirus 27        | QIR30306.1     | PVaNarna24  |
| Sclerotinia sclerotiorum mitovirus 39                      | QUE49178.1     | SsMV39      |
| Sclerotinia sclerotiorum ourmia-like virus 11              | QUE49164.1     | SsOV11      |
| Sclerotinia sclerotiorum ourmia-like virus 15              | QUE49163.1     | SsOV15      |
| Sclerotinia sclerotiorum ourmia-like virus 10              | QUE49124.1     | SsOV10      |
| Sclerotinia sclerotiorum ourmia-like virus 8               | QUE49115.1     | SsOV8       |
| Insect narna-like virus 1                                  | QNS31044.1     | INIV1       |
| Plasmopara viticola lesion associated orfanplasmovirus 5   | QNQ74067.1     | PvLaOrfPIV5 |
| Plasmopara viticola lesion associated orfanplasmovirus 4   | QNQ74066.1     | PvLaOrfPIV4 |
| Plasmopara viticola lesion associated orfanplasmovirus 3   | QNQ74065.1     | PvLaOrfPIV3 |
| Escherichia phage MS2                                      | YP_009640127.1 | EPMS2       |
| Magnaporthe oryzae ourmia-like virus                       | YP_009667033.1 | MOLV1       |
| Soybean leaf-associated ourmiavirus 1                      | YP_009666497.1 | SlaOurV     |
| Epicoccum nigrum ourmia-like virus 1                       | QDB75003.1     | EnOulV1     |
| Penicillium sumatrense ourmia-like virus 1                 | QDB75000.1     | PmOLV1      |
| Alternaria tenuissima narnavirus 1                         | QDB74997.1     | AtNV1       |
| Cladosporium tenuissimum narnavirus 1                      | QDB74996.1     | CtNV1       |
| Neofusicoccum parvum narnavirus 1                          | QDB74994.1     | NpNV1       |
| Ochlerotatus-associated narna-like virus 1                 | AGW51766.2     | ONLV1       |
| Culex narnavirus 1                                         | QBR53296.1     | CxNV1       |
| Combu positive-strand RNA mycovirus                        | QAB47442.1     | CPRMV       |
| Plasmopara viticola lesion associated narnavirus 17        | QIR30296.1     | PVaNarna17  |
| Plasmopara viticola lesion associated narnavirus 15        | QIR30294.1     | PVaNarna15  |
| Plasmopara viticola lesion associated narnavirus 13        | QIR30292.1     | PVaNarna13  |
| Plasmopara viticola lesion associated narnavirus 12        | QIR30291.1     | PVaNarna12  |
| Plasmopara viticola lesion associated narnavirus 11        | QIR30290.1     | PVaNarna11  |
| Plasmopara viticola lesion associated narnavirus 10        | QIR30289.1     | PVaNarna10  |
| Plasmopara viticola lesion associated narnavirus 9         | QIR30288.1     | PVaNarna9   |
| Plasmopara viticola lesion associated narnavirus 3         | QIR30282.1     | PVaNarna3   |
| Plasmopara viticola lesion associated narnavirus 1         | QIR30280.1     | PVaNarna1   |
| Plasmodium vivax Narna-Like virus 1                        | QHQ74301.1     | PvNLV1      |
| Sclerotinia sclerotiorum ourmia-like virus 4               | QHG11400.1     | SsOV4       |
| Plasmopara viticola lesion associated ourmia-like virus 91 | QGY72621.1     | PVaOurmia91 |
| Ophiostoma mitovirus 5                                     | CAB42653.1     | OMV5        |
| Rhizoctonia solani ourmia-like virus 1                     | ALD89131.1     | RsOV1       |
| Plasmopara viticola lesion associated mitovirus 13         | QIR30236.1     | PVaMito13   |
| Buergenerula spartinae mitovirus 1                         | AHY03257.1     | BsMV1       |
| Botryosphaeria dothidea mitovirus 1                        | QMU24933.1     | BdMV1       |
| Ophiostoma mitovirus 7                                     | AGT55877.1     | OMV7        |
| Leptosphaeria biglobosa mitovirus 1                        | YP_009553599.1 | LbMV1       |
| Soybean leaf-associated mitovirus 5                        | ALM62240.1     | SlaMV5      |
| Fusarium boothii mitovirus 1                               | BBG56022.1     | FbMV1       |
| Soybean leaf-associated mitovirus 1                        | ALM62241.1     | SlaMV1      |
| Plasmopara viticola lesion associated mitovirus 44         | QIR30267.1     | PVaMito44   |
| Fusarium oxysporum f. sp. dianthi mitovirus 1              | QIC51112.1     | FoMV1       |
| Entomophthora muscae mitovirus 7                           | QCF24458.1     | EmMV7       |
| Fusarium circinatum mitovirus 1                            | AHI43533.1     | FcirMV1     |
| Fusarium coeruleum mitovirus 1                             | YP_009126873.1 | FcoeMV1     |
| Fusarium globosum mitovirus 1                              | YP_009126872.1 | FgloMV1     |
| Sclerotinia sclerotiorum mitovirus 6                       | AHX84134.1     | SsMV6       |
| Fusarium andiyazi mitovirus 1                              | QIQ28426.1     | FandMV1     |
| Wenzhou narna-like virus 6                                 | APG77281.1     | WzNLV6      |
| Hubei narna-like virus 12                                  | APG77197.1     | HbNLV12     |
| Changjiang narna-like virus 3                              | YP_009337343.1 | CjNLV3      |
| Wenling narna-like virus 4                                 | YP_009337133.1 | WINLV4      |
| Wenling narna-like virus 2                                 | YP_009337193.1 | WINLV2      |
| Changjiang narna-like virus 2                              | YP_009337311.1 | CjNLV2      |
| Beihai narna-like virus 9                                  | YP_009333316.1 | BhNLV9      |
| Hubei narna-like virus 10                                  | APG77208.1     | HbNLV10     |
| Plasmopara viticola lesion associated ourmia-like virus 14 | QGY72544.1     | PVaOurmia14 |
| Plasmopara viticola lesion associated ourmia-like virus 4  | QGY72534.1     | PVaOurmia4  |
| Phaeoacremonium minimum ourmia-like virus 3                | QDB75009.1     | PmOLV3      |
| Botryosphaeria dothidea Ourmia-like virus                  | QED22728.1     | BdOLV       |
| Sclerotinia sclerotiorum mitovirus 2                       | AHX84129.1     | SsMV2       |
| Fusarium asiaticum mitovirus 1                             | UNG44312.1     | FaMV1       |
| Fusarium asiaticum mitovirus 2                             | UNG44313.1     | FaMV2       |

|                                       |            |            |
|---------------------------------------|------------|------------|
| Fusarium asiaticum mitovirus 3        | UNG44314.1 | FaMV3      |
| Fusarium asiaticum mitovirus 4        | UNG44315.1 | FaMV4      |
| Fusarium asiaticum mitovirus 5        | UNG44316.1 | FaMV5      |
| Fusarium asiaticum mitovirus 6        | UNG44317.1 | FaMV6      |
| Fusarium asiaticum mitovirus 7        | UNG44318.1 | FaMV7      |
| Fusarium asiaticum mitovirus 8        | UNG44319.1 | FaMV8      |
| Fusarium poae mitovirus 1 SZ-4        | UNG44320.1 | FpMV1 SZ-4 |
| Fusarium asiaticum narnavirus 1       | UNG44322.1 | FaNV1      |
| Fusarium asiaticum ourmiavirus 1      | UNG44324.1 | FaOV1      |
| Fusarium asiaticum ourmiavirus 2      | UNG44321.1 | FaOV2      |
| Sclerotinia sclerotiorum narnavirus 3 | QZE12022.1 | SsNV3      |
| Sclerotinia sclerotiorum narnavirus 4 | QZE12024.1 | SsNV4      |
| Beihai levi-like virus 1              | APG77061.1 | BhLLV1     |

---

Table S2 Primers were used in this study.

| Primer name        | Sequence                    | Purpose                                                       |
|--------------------|-----------------------------|---------------------------------------------------------------|
| M-TF/TR            | CTCAGCCCTACACAAAGACC        | FaMBV1 full length detection                                  |
| AC Primer          | ACACAAAGACC                 | Reverse transcription                                         |
| BL-F               | GGCTACAGGTTTGTGCAACG        | 247bp, L segment detection                                    |
| BL-R               | TGTTGGGCAGTGCACACTTA        | 247bp, L segment detection                                    |
| BS-F               | GCACTTGCTGTAGGGTGAGAT       | 241bp, S segment detection                                    |
| BS-R               | CCTGGGTCTGGAGTTTCCTT        | 241bp, S segment detection                                    |
| FaMYBV1-MFR        | ctcagcACACAAAGACCACCTCCACAC | 345bp, M1 region of M segment                                 |
| M5TI               | TCACATTGACCAACTGCCCA        | 345bp, M1 region of M segment; inner primer of classic 5'RACE |
| 208F               | CAATTGCCTTCGCCTTGGAC        | 389bp, M2 region of M segment                                 |
| 208R               | AATTCGTCCGTCGATCCCAG        | 389bp, M2 region of M segment                                 |
| G2432_F            | TTTGAAACTATCATTGGTGCAT      | 392bp, M3 region of M segment                                 |
| G2432_R            | CTCATTTTGGCATTAGCTG         | 392bp, M3 region of M segment                                 |
| FaMYBV1-MFF        | gcACACAAAGACCCCTCCATAATTCTG | 337bp, M4 region of M segment                                 |
| M3TI               | TGATTGGGTCATGAAGGGCA        | 337bp, M1 region of M segment; inner primer of classic 3'RACE |
| 07335F             | CTCACTAATTCTAGCATCGCATC     | FGSG_07335, Actin, 199bp & 497bp (gDNA)                       |
| 07335R             | GGCCTTGCACATAACCCGAA        | FGSG_07335, Actin, 199bp & 497bp (gDNA)                       |
| M5TO               | TGAGCAAATGGTGGGGTCA         | outer primer of classic 5'RACE for M segment                  |
| M3TO               | ATCCAGGCAAACAATGCAGC        | outer primer of classic 3'RACE for M segment                  |
| 11sp               | ACCAGATAATAGGGGCTTCC        | Fusarium asiaticum mitovirus 1                                |
| 11ap               | AATACTAGCGGTACTCCTTTTCG     | Fusarium asiaticum mitovirus 1                                |
| 582sp              | AACCGCTGTCTGTGAGGTACG       | Fusarium asiaticum mitovirus 2                                |
| 582ap              | CCCGATTTTGGTGATTATGC        | Fusarium asiaticum mitovirus 2                                |
| 54sp               | TTACCTGCCTGCTGAGCCT         | Fusarium asiaticum mitovirus 3                                |
| 54ap               | ACATAACCTTGCCCTACTTC        | Fusarium asiaticum mitovirus 3                                |
| 581sp              | CTGTAATCTGCGAGTTCTG         | Fusarium asiaticum mitovirus 4                                |
| 581ap              | CCATACTTGGTGATGATGTGG       | Fusarium asiaticum mitovirus 4                                |
| 390sp              | TTAGGCCCTTTCAGTCTTTTG       | Fusarium asiaticum mitovirus 5                                |
| 390ap              | CCGCTTCACGATTCTTTATT        | Fusarium asiaticum mitovirus 5                                |
| 2262sp             | CGCTGATAAGGAAGGAAAGAC       | Fusarium asiaticum mitovirus 6                                |
| 2262ap             | GCTGAAACCTGGAATGGAGT        | Fusarium asiaticum mitovirus 6                                |
| 125sp              | GAGGCCGAGAAAGCAAAG          | Fusarium asiaticum mitovirus 7                                |
| 125ap              | ATGCCATTATAGGTCAGGATGT      | Fusarium asiaticum mitovirus 7                                |
| 1321sp             | CCATTTGCGCTCCCTATTC         | Fusarium asiaticum mitovirus 8                                |
| 1321ap             | TTGGCATTCTATCTGTTGCTG       | Fusarium asiaticum mitovirus 8                                |
| 289sp              | GTTATCTGGAAACCCCATCG        | Fusarium poae mitovirus 1                                     |
| 289ap              | CCCTGAGGACCTGCCTTATT        | Fusarium poae mitovirus 1                                     |
| FaOFNV1S1F         | CCGCTCACCCCTTAAGATCCAC      | Fusarium asiaticum narnavirus 1 RNA1                          |
| FaOFNV1S1R         | ATCTTGTACTIONCATCGTTACGC    | Fusarium asiaticum narnavirus 1 RNA1                          |
| 62F                | CAGGCTTCCAATGCCTGAGA        | Fusarium asiaticum narnavirus 1 RNA2                          |
| 62R                | GCAAAACCTGGTTCCGTGAC        | Fusarium asiaticum narnavirus 1 RNA2                          |
| 862sp              | CATCCGTCGCATTATTTCC         | Fusarium asiaticum ourmiavirus 1                              |
| 862ap              | CATCCGTCGCATTATTTCC         | Fusarium asiaticum ourmiavirus 1                              |
| 1857sp             | GCGGTCTCCTCCTCAAATG         | Fusarium asiaticum ourmiavirus 2, 519bp                       |
| 1857ap             | GGACAAACGGATGGCAAG          | Fusarium asiaticum ourmiavirus 2, 519bp                       |
| 109sp              | GTAATCTGCCGATGTGGTTG        | Fusarium graminearum hypovirus 2                              |
| 109ap              | CCCCTTGCTTTAGACGCT          | Fusarium graminearum hypovirus 2                              |
| 373sp              | AACCAAGAAAAGGGCAGTATG       | Fusarium asiaticum fusarivirus 1                              |
| 373ap              | GAAAGGCTTAAAGCTGAACG        | Fusarium asiaticum fusarivirus 1                              |
| 113sp              | TGGGATGCCTTTCTCACC          | Fusarium asiaticum negative-stranded RNA virus 1              |
| 113ap              | AACGCTACTGTCTCGTCAATG       | Fusarium asiaticum negative-stranded RNA virus 1              |
| FgNSRV1-F          | ATTGGCTTCAGTTAAGACGAA       | Fusarium graminearum negative-stranded RNA virus 1            |
| FgNSRV1-R          | ACTAGCCATTACTGAACACC        | Fusarium graminearum negative-stranded RNA virus 1            |
| FgPV(S)-TF(171203) | GCTGGATCAGGAACCGTCCTAATTG   | SMARTer 3'RACE for S segment                                  |
| FgPV(S)-TR(171202) | CAGCAAGTGCATGAGGATTTGAGGAG  | SMARTer 5'RACE for S segment                                  |
| FgPV-TF(171009)    | GCAGAACTATGGCTACTGTGGAAGGG  | SMARTer 3'RACE for L segment                                  |
| FgPV-TR(171009)    | TGTGAATAACGATGGGCTCGGTTT    | SMARTer 5'RACE for L segment                                  |

Table S3. Strain information used for RNA isolation and RNA-seq.

| Location  | Isolate |
|-----------|---------|
| Nanjing   | 60      |
| Guangshui | 65      |
| Suizhou   | 201     |
| Xiaogan   | 24      |
| Total     | 350     |
